# Supplementary material
Source: publisher figshare collection journal article supplement (https://acs.figshare.com/ndownloader/files/4036021)
Supplement: Supplementary file 1 [file 4036021]

 
data_rh076
 
_audit_creation_method            SHELXL-97
_chemical_name_systematic
;
 ?
;
_chemical_name_common             ?
_chemical_melting_point           ?
_chemical_formula_moiety          ?
_chemical_formula_sum
 'C34 H49 N6 O9 Ru2'
_chemical_formula_weight          887.93
 
loop_
 _atom_type_symbol
 _atom_type_description
 _atom_type_scat_dispersion_real
 _atom_type_scat_dispersion_imag
 _atom_type_scat_source
 'C'  'C'   0.0033   0.0016
 'International Tables Vol C Tables 4.2.6.8 and 6.1.1.4'
 'H'  'H'   0.0000   0.0000
 'International Tables Vol C Tables 4.2.6.8 and 6.1.1.4'
 'N'  'N'   0.0061   0.0033
 'International Tables Vol C Tables 4.2.6.8 and 6.1.1.4'
 'O'  'O'   0.0106   0.0060
 'International Tables Vol C Tables 4.2.6.8 and 6.1.1.4'
 'Ru'  'Ru'  -1.2594   0.8363
 'International Tables Vol C Tables 4.2.6.8 and 6.1.1.4'
 
_symmetry_cell_setting            monoclinic
_symmetry_space_group_name_H-M    'C 2/c'
 
loop_
 _symmetry_equiv_pos_as_xyz
 'x, y, z'
 '-x, y, -z+1/2'
 'x+1/2, y+1/2, z'
 '-x+1/2, y+1/2, -z+1/2'
 '-x, -y, -z'
 'x, -y, z-1/2'
 '-x+1/2, -y+1/2, -z'
 'x+1/2, -y+1/2, z-1/2'
 
_cell_length_a                    23.5778(8)
_cell_length_b                    23.0939(8)
_cell_length_c                    8.1395(3)
_cell_angle_alpha                 90.00
_cell_angle_beta                  101.639(2)
_cell_angle_gamma                 90.00
_cell_volume                      4340.9(3)
_cell_formula_units_Z             4
_cell_measurement_temperature     103(2)
_cell_measurement_reflns_used     5161
_cell_measurement_theta_min       2.68
_cell_measurement_theta_max       28.00
 
_exptl_crystal_description        needle
_exptl_crystal_colour             purple
_exptl_crystal_size_max           0.60
_exptl_crystal_size_mid           0.14
_exptl_crystal_size_min           0.10
_exptl_crystal_density_meas       ?
_exptl_crystal_density_diffrn     1.359
_exptl_crystal_density_method     'not measured'
_exptl_crystal_F_000              1820
_exptl_absorpt_coefficient_mu     0.747
_exptl_absorpt_correction_type    multi-scan
_exptl_absorpt_correction_T_min   0.793
_exptl_absorpt_correction_T_max   0.928
_exptl_absorpt_process_details    ?
 
_exptl_special_details
;
 ?
;
 
_diffrn_ambient_temperature       103(2)
_diffrn_radiation_wavelength      0.71073
_diffrn_radiation_type            MoK\a
_diffrn_radiation_source          'fine-focus sealed tube'
_diffrn_radiation_monochromator   graphite
_diffrn_measurement_device_type   'Bruker X8 APEX II'
_diffrn_measurement_method        'area detector'
_diffrn_detector_area_resol_mean  ?
_diffrn_standards_number          ?
_diffrn_standards_interval_count  ?
_diffrn_standards_interval_time   ?
_diffrn_standards_decay_%         ?
_diffrn_reflns_number             5144
_diffrn_reflns_av_R_equivalents   0.028
_diffrn_reflns_av_sigmaI/netI     0.0431
_diffrn_reflns_limit_h_min        -31
_diffrn_reflns_limit_h_max        30
_diffrn_reflns_limit_k_min        0
_diffrn_reflns_limit_k_max        30
_diffrn_reflns_limit_l_min        0
_diffrn_reflns_limit_l_max        10
_diffrn_reflns_theta_min          2.49
_diffrn_reflns_theta_max          28.02
_reflns_number_total              5144
_reflns_number_gt                 3945
_reflns_threshold_expression      >2sigma(I)
 
_computing_data_collection        ?
_computing_cell_refinement        ?
_computing_data_reduction         ?
_computing_structure_solution     ?
_computing_structure_refinement   'SHELXL-97 (Sheldrick, 1997)'
_computing_molecular_graphics     ?
_computing_publication_material   ?
 
_refine_special_details
;
 Refinement of F^2^ against ALL reflections.  The weighted R-factor wR and
 goodness of fit S are based on F^2^, conventional R-factors R are based
 on F, with F set to zero for negative F^2^. The threshold expression of
 F^2^ > 2sigma(F^2^) is used only for calculating R-factors(gt) etc. and is
 not relevant to the choice of reflections for refinement.  R-factors based
 on F^2^ are statistically about twice as large as those based on F, and R-
 factors based on ALL data will be even larger.
;
 
_refine_ls_structure_factor_coef  Fsqd
_refine_ls_matrix_type            full
_refine_ls_weighting_scheme       calc
_refine_ls_weighting_details
 'calc w=1/[\s^2^(Fo^2^)+(0.0392P)^2^+2.8013P] where P=(Fo^2^+2Fc^2^)/3'
_atom_sites_solution_primary      direct
_atom_sites_solution_secondary    difmap
_atom_sites_solution_hydrogens    geom
_refine_ls_hydrogen_treatment     constr
_refine_ls_extinction_method      none
_refine_ls_extinction_coef        ?
_refine_ls_number_reflns          5144
_refine_ls_number_parameters      242
_refine_ls_number_restraints      0
_refine_ls_R_factor_all           0.0498
_refine_ls_R_factor_gt            0.0304
_refine_ls_wR_factor_ref          0.0809
_refine_ls_wR_factor_gt           0.0747
_refine_ls_goodness_of_fit_ref    1.035
_refine_ls_restrained_S_all       1.035
_refine_ls_shift/su_max           0.003
_refine_ls_shift/su_mean          0.000
 
loop_
 _atom_site_label
 _atom_site_type_symbol
 _atom_site_fract_x
 _atom_site_fract_y
 _atom_site_fract_z
 _atom_site_U_iso_or_equiv
 _atom_site_adp_type
 _atom_site_occupancy
 _atom_site_symmetry_multiplicity
 _atom_site_calc_flag
 _atom_site_refinement_flags
 _atom_site_disorder_assembly
 _atom_site_disorder_group
C1 C 0.0000 0.28610(16) 0.2500 0.0219(8) Uani 1 2 d S . .
C2 C 0.0000 0.16989(14) 0.2500 0.0128(7) Uani 1 2 d S . .
C3 C -0.10659(11) 0.28444(11) 0.2267(4) 0.0253(6) Uani 1 1 d . . .
H3 H -0.1369 0.2537 0.2174 0.030 Uiso 1 1 calc R . .
C4 C -0.10608(14) 0.31677(13) 0.3891(4) 0.0363(7) Uani 1 1 d . . .
H4A H -0.0935 0.2906 0.4842 0.054 Uiso 1 1 calc R . .
H4B H -0.1451 0.3311 0.3904 0.054 Uiso 1 1 calc R . .
H4C H -0.0792 0.3495 0.3976 0.054 Uiso 1 1 calc R . .
C5 C -0.12337(13) 0.32353(13) 0.0739(4) 0.0384(8) Uani 1 1 d . . .
H5A H -0.0996 0.3587 0.0902 0.058 Uiso 1 1 calc R . .
H5B H -0.1644 0.3340 0.0592 0.058 Uiso 1 1 calc R . .
H5C H -0.1169 0.3030 -0.0261 0.058 Uiso 1 1 calc R . .
C11 C 0.0000 0.10757(15) 0.2500 0.0159(7) Uani 1 2 d S . .
C13 C 0.0000 -0.00623(16) 0.2500 0.0349(11) Uani 1 2 d S . .
H13 H 0.0000 -0.0474 0.2500 0.042 Uiso 1 2 calc SR . .
C14 C -0.05121(11) 0.02294(11) 0.1885(4) 0.0271(6) Uani 1 1 d . . .
C15 C -0.10673(12) -0.00815(12) 0.1263(4) 0.0368(8) Uani 1 1 d . . .
H15A H -0.1382 0.0119 0.1650 0.055 Uiso 1 1 calc R . .
H15B H -0.1037 -0.0479 0.1696 0.055 Uiso 1 1 calc R . .
H15C H -0.1148 -0.0090 0.0034 0.055 Uiso 1 1 calc R . .
C21 C -0.26440(11) 0.05378(12) -0.1935(3) 0.0251(6) Uani 1 1 d . . .
H21A H -0.2787 0.0853 -0.2716 0.038 Uiso 1 1 calc R . .
H21B H -0.2970 0.0361 -0.1541 0.038 Uiso 1 1 calc R . .
H21C H -0.2453 0.0245 -0.2508 0.038 Uiso 1 1 calc R . .
C22 C -0.22166(10) 0.07756(11) -0.0459(3) 0.0190(5) Uani 1 1 d . . .
C23 C -0.23899(11) 0.08592(11) 0.1048(3) 0.0206(5) Uani 1 1 d . . .
H23 H -0.2774 0.0746 0.1087 0.025 Uiso 1 1 calc R . .
C24 C -0.20603(11) 0.10919(11) 0.2521(3) 0.0200(5) Uani 1 1 d . . .
C25 C -0.22949(12) 0.10527(13) 0.4110(3) 0.0281(6) Uani 1 1 d . . .
H25A H -0.2171 0.0687 0.4683 0.042 Uiso 1 1 calc R . .
H25B H -0.2719 0.1067 0.3832 0.042 Uiso 1 1 calc R . .
H25C H -0.2148 0.1378 0.4847 0.042 Uiso 1 1 calc R . .
C31 C -0.23632(12) 0.25247(13) -0.2365(4) 0.0302(7) Uani 1 1 d . . .
H31A H -0.2695 0.2263 -0.2675 0.045 Uiso 1 1 calc R . .
H31B H -0.2318 0.2753 -0.3347 0.045 Uiso 1 1 calc R . .
H31C H -0.2429 0.2786 -0.1472 0.045 Uiso 1 1 calc R . .
C32 C -0.18228(11) 0.21763(11) -0.1754(3) 0.0181(5) Uani 1 1 d . . .
C33 C -0.14561(11) 0.20662(12) -0.2847(3) 0.0213(5) Uani 1 1 d . . .
H33 H -0.1559 0.2243 -0.3920 0.026 Uiso 1 1 calc R . .
C34 C -0.09525(10) 0.17280(11) -0.2578(3) 0.0191(5) Uani 1 1 d . . .
C35 C -0.06266(12) 0.16853(13) -0.3979(3) 0.0266(6) Uani 1 1 d . . .
H35A H -0.0372 0.2022 -0.3949 0.040 Uiso 1 1 calc R . .
H35B H -0.0902 0.1675 -0.5056 0.040 Uiso 1 1 calc R . .
H35C H -0.0393 0.1331 -0.3847 0.040 Uiso 1 1 calc R . .
N1 N -0.05069(9) 0.25487(9) 0.2301(3) 0.0208(5) Uani 1 1 d . . .
N2 N -0.05159(8) 0.19507(8) 0.1982(3) 0.0138(4) Uani 1 1 d . . .
N11 N -0.05075(8) 0.08207(9) 0.1829(3) 0.0164(4) Uani 1 1 d . . .
O1 O 0.0000 0.33886(11) 0.2500 0.0310(7) Uani 1 2 d S . .
O11 O -0.17126(7) 0.08824(7) -0.0747(2) 0.0179(4) Uani 1 1 d . . .
O12 O -0.15641(8) 0.13296(7) 0.2681(2) 0.0189(4) Uani 1 1 d . . .
O21 O -0.17555(7) 0.19986(7) -0.0248(2) 0.0174(4) Uani 1 1 d . . .
O22 O -0.07448(7) 0.14398(7) -0.1251(2) 0.0164(4) Uani 1 1 d . . .
Ru1 Ru -0.113501(8) 0.141373(8) 0.07520(2) 0.01367(7) Uani 1 1 d . . .
 
loop_
 _atom_site_aniso_label
 _atom_site_aniso_U_11
 _atom_site_aniso_U_22
 _atom_site_aniso_U_33
 _atom_site_aniso_U_23
 _atom_site_aniso_U_13
 _atom_site_aniso_U_12
C1 0.0226(18) 0.0209(18) 0.022(2) 0.000 0.0035(16) 0.000
C2 0.0171(16) 0.0137(16) 0.0088(16) 0.000 0.0052(13) 0.000
C3 0.0184(12) 0.0212(13) 0.0355(17) -0.0033(12) 0.0035(12) 0.0051(11)
C4 0.0372(17) 0.0289(15) 0.045(2) -0.0089(15) 0.0142(16) 0.0011(13)
C5 0.0364(17) 0.0232(14) 0.048(2) 0.0041(14) -0.0097(16) 0.0040(13)
C11 0.0158(16) 0.0198(17) 0.0118(17) 0.000 0.0023(14) 0.000
C13 0.026(2) 0.0109(17) 0.057(3) 0.000 -0.017(2) 0.000
C14 0.0203(13) 0.0189(13) 0.0364(17) 0.0005(12) -0.0076(12) -0.0022(11)
C15 0.0236(14) 0.0190(14) 0.058(2) 0.0042(14) -0.0149(15) -0.0037(11)
C21 0.0196(13) 0.0313(15) 0.0226(15) -0.0037(12) -0.0004(12) -0.0023(11)
C22 0.0150(11) 0.0178(12) 0.0220(13) 0.0025(11) -0.0017(10) 0.0004(10)
C23 0.0143(11) 0.0246(13) 0.0224(14) 0.0046(11) 0.0025(10) -0.0020(10)
C24 0.0202(12) 0.0207(13) 0.0195(14) 0.0041(11) 0.0049(11) 0.0024(10)
C25 0.0274(15) 0.0372(16) 0.0212(15) 0.0045(12) 0.0087(12) -0.0026(12)
C31 0.0252(14) 0.0405(17) 0.0239(15) 0.0037(13) 0.0028(12) 0.0148(13)
C32 0.0160(11) 0.0195(12) 0.0173(13) 0.0001(10) 0.0002(10) 0.0011(10)
C33 0.0217(13) 0.0273(14) 0.0148(13) 0.0055(11) 0.0037(10) 0.0032(11)
C34 0.0178(12) 0.0225(13) 0.0169(13) -0.0037(10) 0.0035(10) -0.0041(10)
C35 0.0221(13) 0.0419(17) 0.0163(13) 0.0003(12) 0.0049(11) 0.0020(12)
N1 0.0164(10) 0.0131(10) 0.0321(13) -0.0017(9) 0.0030(10) 0.0028(8)
N2 0.0138(9) 0.0124(9) 0.0149(10) 0.0005(8) 0.0025(8) 0.0005(8)
N11 0.0141(9) 0.0156(10) 0.0176(11) 0.0009(9) -0.0013(8) -0.0004(8)
O1 0.0270(14) 0.0165(13) 0.0474(19) 0.000 0.0027(14) 0.000
O11 0.0143(8) 0.0203(9) 0.0182(9) -0.0012(7) 0.0012(7) 0.0009(7)
O12 0.0185(8) 0.0243(9) 0.0135(9) 0.0008(7) 0.0021(7) -0.0019(7)
O21 0.0147(8) 0.0209(9) 0.0167(9) 0.0012(7) 0.0035(7) 0.0019(7)
O22 0.0133(8) 0.0205(9) 0.0154(9) -0.0010(7) 0.0031(7) 0.0015(7)
Ru1 0.01173(10) 0.01633(10) 0.01256(11) 0.00067(8) 0.00157(7) 0.00042(8)
 
_geom_special_details
;
 All esds (except the esd in the dihedral angle between two l.s. planes)
 are estimated using the full covariance matrix.  The cell esds are taken
 into account individually in the estimation of esds in distances, angles
 and torsion angles; correlations between esds in cell parameters are only
 used when they are defined by crystal symmetry.  An approximate (isotropic)
 treatment of cell esds is used for estimating esds involving l.s. planes.
;
 
loop_
 _geom_bond_atom_site_label_1
 _geom_bond_atom_site_label_2
 _geom_bond_distance
 _geom_bond_site_symmetry_2
 _geom_bond_publ_flag
C1 O1 1.218(4) . ?
C1 N1 1.377(3) . ?
C1 N1 1.377(3) 2 ?
C2 N2 1.337(2) . ?
C2 N2 1.337(2) 2 ?
C2 C11 1.439(5) . ?
C3 N1 1.480(3) . ?
C3 C4 1.516(4) . ?
C3 C5 1.523(4) . ?
C3 H3 1.0000 . ?
C4 H4A 0.9800 . ?
C4 H4B 0.9800 . ?
C4 H4C 0.9800 . ?
C5 H5A 0.9800 . ?
C5 H5B 0.9800 . ?
C5 H5C 0.9800 . ?
C11 N11 1.347(2) 2 ?
C11 N11 1.347(2) . ?
C13 C14 1.385(3) 2 ?
C13 C14 1.385(3) . ?
C13 H13 0.9500 . ?
C14 N11 1.367(3) . ?
C14 C15 1.489(4) . ?
C15 H15A 0.9800 . ?
C15 H15B 0.9800 . ?
C15 H15C 0.9800 . ?
C21 C22 1.508(3) . ?
C21 H21A 0.9800 . ?
C21 H21B 0.9800 . ?
C21 H21C 0.9800 . ?
C22 O11 1.281(3) . ?
C22 C23 1.382(4) . ?
C23 C24 1.398(4) . ?
C23 H23 0.9500 . ?
C24 O12 1.275(3) . ?
C24 C25 1.508(4) . ?
C25 H25A 0.9800 . ?
C25 H25B 0.9800 . ?
C25 H25C 0.9800 . ?
C31 C32 1.504(3) . ?
C31 H31A 0.9800 . ?
C31 H31B 0.9800 . ?
C31 H31C 0.9800 . ?
C32 O21 1.272(3) . ?
C32 C33 1.384(4) . ?
C33 C34 1.401(3) . ?
C33 H33 0.9500 . ?
C34 O22 1.279(3) . ?
C34 C35 1.502(4) . ?
C35 H35A 0.9800 . ?
C35 H35B 0.9800 . ?
C35 H35C 0.9800 . ?
N1 N2 1.405(3) . ?
N2 Ru1 2.0201(19) . ?
N11 Ru1 2.076(2) . ?
O11 Ru1 2.0440(17) . ?
O12 Ru1 2.0417(18) . ?
O21 Ru1 2.0363(17) . ?
O22 Ru1 2.0279(17) . ?
 
loop_
 _geom_angle_atom_site_label_1
 _geom_angle_atom_site_label_2
 _geom_angle_atom_site_label_3
 _geom_angle
 _geom_angle_site_symmetry_1
 _geom_angle_site_symmetry_3
 _geom_angle_publ_flag
O1 C1 N1 121.58(15) . . ?
O1 C1 N1 121.58(15) . 2 ?
N1 C1 N1 116.8(3) . 2 ?
N2 C2 N2 128.5(3) . 2 ?
N2 C2 C11 115.77(15) . . ?
N2 C2 C11 115.77(15) 2 . ?
N1 C3 C4 111.1(2) . . ?
N1 C3 C5 111.9(2) . . ?
C4 C3 C5 112.0(2) . . ?
N1 C3 H3 107.2 . . ?
C4 C3 H3 107.2 . . ?
C5 C3 H3 107.2 . . ?
C3 C4 H4A 109.5 . . ?
C3 C4 H4B 109.5 . . ?
H4A C4 H4B 109.5 . . ?
C3 C4 H4C 109.5 . . ?
H4A C4 H4C 109.5 . . ?
H4B C4 H4C 109.5 . . ?
C3 C5 H5A 109.5 . . ?
C3 C5 H5B 109.5 . . ?
H5A C5 H5B 109.5 . . ?
C3 C5 H5C 109.5 . . ?
H5A C5 H5C 109.5 . . ?
H5B C5 H5C 109.5 . . ?
N11 C11 N11 128.1(3) 2 . ?
N11 C11 C2 115.93(16) 2 . ?
N11 C11 C2 115.93(16) . . ?
C14 C13 C14 121.8(3) 2 . ?
C14 C13 H13 119.1 2 . ?
C14 C13 H13 119.1 . . ?
N11 C14 C13 119.1(2) . . ?
N11 C14 C15 118.9(2) . . ?
C13 C14 C15 122.1(2) . . ?
C14 C15 H15A 109.5 . . ?
C14 C15 H15B 109.5 . . ?
H15A C15 H15B 109.5 . . ?
C14 C15 H15C 109.5 . . ?
H15A C15 H15C 109.5 . . ?
H15B C15 H15C 109.5 . . ?
C22 C21 H21A 109.5 . . ?
C22 C21 H21B 109.5 . . ?
H21A C21 H21B 109.5 . . ?
C22 C21 H21C 109.5 . . ?
H21A C21 H21C 109.5 . . ?
H21B C21 H21C 109.5 . . ?
O11 C22 C23 125.9(2) . . ?
O11 C22 C21 114.8(2) . . ?
C23 C22 C21 119.2(2) . . ?
C22 C23 C24 127.0(2) . . ?
C22 C23 H23 116.5 . . ?
C24 C23 H23 116.5 . . ?
O12 C24 C23 126.4(2) . . ?
O12 C24 C25 115.2(2) . . ?
C23 C24 C25 118.4(2) . . ?
C24 C25 H25A 109.5 . . ?
C24 C25 H25B 109.5 . . ?
H25A C25 H25B 109.5 . . ?
C24 C25 H25C 109.5 . . ?
H25A C25 H25C 109.5 . . ?
H25B C25 H25C 109.5 . . ?
C32 C31 H31A 109.5 . . ?
C32 C31 H31B 109.5 . . ?
H31A C31 H31B 109.5 . . ?
C32 C31 H31C 109.5 . . ?
H31A C31 H31C 109.5 . . ?
H31B C31 H31C 109.5 . . ?
O21 C32 C33 126.0(2) . . ?
O21 C32 C31 115.1(2) . . ?
C33 C32 C31 118.9(2) . . ?
C32 C33 C34 128.4(2) . . ?
C32 C33 H33 115.8 . . ?
C34 C33 H33 115.8 . . ?
O22 C34 C33 126.2(2) . . ?
O22 C34 C35 116.1(2) . . ?
C33 C34 C35 117.7(2) . . ?
C34 C35 H35A 109.5 . . ?
C34 C35 H35B 109.5 . . ?
H35A C35 H35B 109.5 . . ?
C34 C35 H35C 109.5 . . ?
H35A C35 H35C 109.5 . . ?
H35B C35 H35C 109.5 . . ?
C1 N1 N2 121.1(2) . . ?
C1 N1 C3 120.6(2) . . ?
N2 N1 C3 118.05(19) . . ?
C2 N2 N1 113.0(2) . . ?
C2 N2 Ru1 114.18(16) . . ?
N1 N2 Ru1 132.66(15) . . ?
C11 N11 C14 115.8(2) . . ?
C11 N11 Ru1 112.46(18) . . ?
C14 N11 Ru1 131.57(17) . . ?
C22 O11 Ru1 122.51(17) . . ?
C24 O12 Ru1 123.32(17) . . ?
C32 O21 Ru1 122.62(16) . . ?
C34 O22 Ru1 122.40(15) . . ?
N2 Ru1 O22 88.88(7) . . ?
N2 Ru1 O21 100.36(7) . . ?
O22 Ru1 O21 93.73(7) . . ?
N2 Ru1 O12 95.62(7) . . ?
O22 Ru1 O12 175.33(7) . . ?
O21 Ru1 O12 86.73(7) . . ?
N2 Ru1 O11 172.76(7) . . ?
O22 Ru1 O11 83.90(7) . . ?
O21 Ru1 O11 79.71(7) . . ?
O12 Ru1 O11 91.61(7) . . ?
N2 Ru1 N11 79.25(8) . . ?
O22 Ru1 N11 87.64(7) . . ?
O21 Ru1 N11 178.57(8) . . ?
O12 Ru1 N11 91.94(8) . . ?
O11 Ru1 N11 100.85(7) . . ?
 
loop_
 _geom_torsion_atom_site_label_1
 _geom_torsion_atom_site_label_2
 _geom_torsion_atom_site_label_3
 _geom_torsion_atom_site_label_4
 _geom_torsion
 _geom_torsion_site_symmetry_1
 _geom_torsion_site_symmetry_2
 _geom_torsion_site_symmetry_3
 _geom_torsion_site_symmetry_4
 _geom_torsion_publ_flag
N2 C2 C11 N11 -173.87(14) . . . 2 ?
N2 C2 C11 N11 6.13(14) 2 . . 2 ?
N2 C2 C11 N11 6.13(14) . . . . ?
N2 C2 C11 N11 -173.87(14) 2 . . . ?
C14 C13 C14 N11 2.34(18) 2 . . . ?
C14 C13 C14 C15 -178.4(3) 2 . . . ?
O11 C22 C23 C24 2.3(4) . . . . ?
C21 C22 C23 C24 -177.7(3) . . . . ?
C22 C23 C24 O12 8.7(4) . . . . ?
C22 C23 C24 C25 -169.8(3) . . . . ?
O21 C32 C33 C34 2.4(5) . . . . ?
C31 C32 C33 C34 -176.1(3) . . . . ?
C32 C33 C34 O22 2.1(5) . . . . ?
C32 C33 C34 C35 -179.2(3) . . . . ?
O1 C1 N1 N2 167.69(15) . . . . ?
N1 C1 N1 N2 -12.31(15) 2 . . . ?
O1 C1 N1 C3 -6.8(3) . . . . ?
N1 C1 N1 C3 173.2(3) 2 . . . ?
C4 C3 N1 C1 -60.3(3) . . . . ?
C5 C3 N1 C1 65.8(3) . . . . ?
C4 C3 N1 N2 125.1(3) . . . . ?
C5 C3 N1 N2 -108.9(3) . . . . ?
N2 C2 N2 N1 -11.14(13) 2 . . . ?
C11 C2 N2 N1 168.86(13) . . . . ?
N2 C2 N2 Ru1 164.60(14) 2 . . . ?
C11 C2 N2 Ru1 -15.40(14) . . . . ?
C1 N1 N2 C2 23.3(3) . . . . ?
C3 N1 N2 C2 -162.1(2) . . . . ?
C1 N1 N2 Ru1 -151.38(15) . . . . ?
C3 N1 N2 Ru1 23.2(3) . . . . ?
N11 C11 N11 C14 2.27(18) 2 . . . ?
C2 C11 N11 C14 -177.73(18) . . . . ?
N11 C11 N11 Ru1 -174.15(14) 2 . . . ?
C2 C11 N11 Ru1 5.85(14) . . . . ?
C13 C14 N11 C11 -4.4(3) . . . . ?
C15 C14 N11 C11 176.3(2) . . . . ?
C13 C14 N11 Ru1 171.14(15) . . . . ?
C15 C14 N11 Ru1 -8.1(4) . . . . ?
C23 C22 O11 Ru1 -18.4(3) . . . . ?
C21 C22 O11 Ru1 161.65(17) . . . . ?
C23 C24 O12 Ru1 -0.6(4) . . . . ?
C25 C24 O12 Ru1 177.89(17) . . . . ?
C33 C32 O21 Ru1 -8.7(4) . . . . ?
C31 C32 O21 Ru1 169.80(17) . . . . ?
C33 C34 O22 Ru1 1.1(3) . . . . ?
C35 C34 O22 Ru1 -177.63(16) . . . . ?
C2 N2 Ru1 O22 -73.65(13) . . . . ?
N1 N2 Ru1 O22 101.0(2) . . . . ?
C2 N2 Ru1 O21 -167.23(13) . . . . ?
N1 N2 Ru1 O21 7.4(2) . . . . ?
C2 N2 Ru1 O12 105.08(13) . . . . ?
N1 N2 Ru1 O12 -80.3(2) . . . . ?
C2 N2 Ru1 O11 -77.3(6) . . . . ?
N1 N2 Ru1 O11 97.3(6) . . . . ?
C2 N2 Ru1 N11 14.17(13) . . . . ?
N1 N2 Ru1 N11 -171.2(2) . . . . ?
C34 O22 Ru1 N2 -105.45(19) . . . . ?
C34 O22 Ru1 O21 -5.14(19) . . . . ?
C34 O22 Ru1 O12 90.3(8) . . . . ?
C34 O22 Ru1 O11 74.09(18) . . . . ?
C34 O22 Ru1 N11 175.27(19) . . . . ?
C32 O21 Ru1 N2 98.31(19) . . . . ?
C32 O21 Ru1 O22 8.78(19) . . . . ?
C32 O21 Ru1 O12 -166.56(19) . . . . ?
C32 O21 Ru1 O11 -74.33(19) . . . . ?
C32 O21 Ru1 N11 172(16) . . . . ?
C24 O12 Ru1 N2 169.45(19) . . . . ?
C24 O12 Ru1 O22 -26.4(9) . . . . ?
C24 O12 Ru1 O21 69.34(19) . . . . ?
C24 O12 Ru1 O11 -10.25(19) . . . . ?
C24 O12 Ru1 N11 -111.17(19) . . . . ?
C22 O11 Ru1 N2 -158.4(5) . . . . ?
C22 O11 Ru1 O22 -162.13(19) . . . . ?
C22 O11 Ru1 O21 -67.21(19) . . . . ?
C22 O11 Ru1 O12 19.17(19) . . . . ?
C22 O11 Ru1 N11 111.46(19) . . . . ?
C11 N11 Ru1 N2 -10.65(13) . . . . ?
C14 N11 Ru1 N2 173.7(3) . . . . ?
C11 N11 Ru1 O22 78.65(13) . . . . ?
C14 N11 Ru1 O22 -97.0(2) . . . . ?
C11 N11 Ru1 O21 -85(3) . . . . ?
C14 N11 Ru1 O21 99(3) . . . . ?
C11 N11 Ru1 O12 -106.00(13) . . . . ?
C14 N11 Ru1 O12 78.3(2) . . . . ?
C11 N11 Ru1 O11 161.99(12) . . . . ?
C14 N11 Ru1 O11 -13.7(3) . . . . ?
 
_diffrn_measured_fraction_theta_max    0.977
_diffrn_reflns_theta_full              28.02
_diffrn_measured_fraction_theta_full   0.977
_refine_diff_density_max    0.999
_refine_diff_density_min   -0.470
_refine_diff_density_rms    0.093

loop_
  _platon_squeeze_void_nr
  _platon_squeeze_void_average_x
  _platon_squeeze_void_average_y
  _platon_squeeze_void_average_z
  _platon_squeeze_void_volume
  _platon_squeeze_void_count_electrons
  _platon_squeeze_void_content
   1  0.500  0.000  0.033       458        50 ' '
   2  0.000  0.500 -0.030       458        50 ' '
_platon_squeeze_details
;
;
